# Supplementary material for: High Voltage Redox-Meditated Flow Batteries with Prussian Blue Solid Booster
Source: MDPI journal article supplement (doi:10.3390/en14227498), 2021-11-10
Supplement: s1 [file s1]

# Supplemental for: High voltage mediated flow batteries with Prussian blue solid booster

John Ostrander<sup>1</sup>, Reza Younesi<sup>1</sup>, Ronnie Mogensen<sup>1\*</sup>

Department of Chemistry–Ångström Laboratory, Uppsala University, Box 538, 75121 Uppsala, Sweden

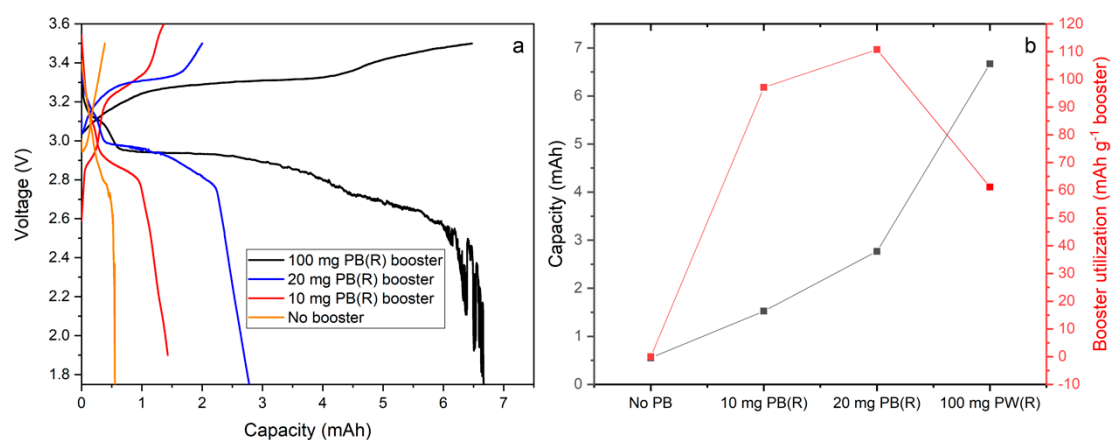

Figure S1. First discharge voltage profile for rhombohedral and monoclinic Prussian blue a with the corresponding PB booster utilization and cell capacity b for 0, 10, 20, and 100 mg rhombohedral booster.

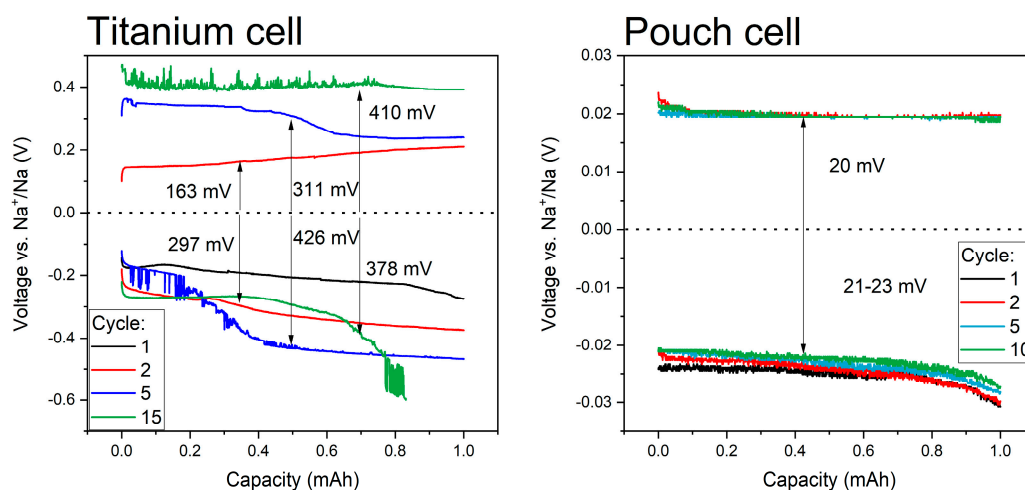

Figure S2. Comparison on symmetrical cells with stripping and plating of 1 mAh sodium in DEGDME-NaTf electrolyte. Polarization for titanium cell setup (a) and pouch cell (b). Both cells used sodium  $\beta$ ' alumina as separator.
